# Supplementary material
Source: publisher figshare collection journal article supplement (https://springernature.figshare.com/ndownloader/files/18742295)
Supplement: Supplementary file 1 [file 18742295]

**Additional file 3 Effects of application of MICROTECH-1(NL) on microorganism density in rhizoplane soil (cfu g-1 soil)**

| **Treatments** | **Microorganism density in rhizoplane soils (cfu g-1 soil)** | | | | | | | | |
| --- | --- | --- | --- | --- | --- | --- | --- | --- | --- |
| **Fungi (×105)** | | | **Bacteria (×109)** | | | **Actinobacteria (×107)** | | |
| SHn+Cp | 14.99 | ± | 0.91b | 2.31 | ± | 0.23d | 3.50 | ± | 0.23d |
| Cn+SHp | 8.89 | ± | 0.13c | 9.68 | ± | 1.09bc | 8.30 | ± | 0.61c |
| SHn+SHp | 6.90 | ± | 0.16cd | 11.17 | ± | 0.88b | 9.53 | ± | 0.38c |
| MIn+Cp | 14.14 | ± | 0.86b | 2.53 | ± | 0.17d | 3.47 | ± | 0.09d |
| Cn+MIp | 8.06 | ± | 0.22cd | 8.52 | ± | 0.55c | 8.60 | ± | 0.52c |
| MIn+MIp | 5.90 | ± | 0.16de | 11.47 | ± | 0.78b | 11.50 | ± | 0.61b |
| SHnp+MInp | 4.40 | ± | 0.47e | 16.65 | ± | 1.12a | 13.33 | ± | 0.78a |
| Cn+Cp | 21.13 | ± | 1.52a | 1.90 | ± | 0.12e | 2.97 | ± | 0.44d |
| P | <0.05 | | | <0.05 | | | <0.05 | | |

Note: Data were expressed as mean ± standard error. Different letters indicate significant difference by LSD0.05.
